# Supplementary material for: Kv1.1 channels regulate early postnatal neurogenesis in mouse hippocampus via the TrkB signaling pathway
Source: eLife journal article supplement (doi:10.7554/elife.58779), 2021-05-21
Supplement: supp [file elife-58779-supp-v2.zip]

Archive with 7 entries (7 files):
- elife_poa_e58779_Figure_1_figure_supplement_1.pdf
- elife_poa_e58779_Figure_1_figure_supplement_2.pdf
- elife_poa_e58779_Figure_6_figure_supplement_1.pdf
- elife_poa_e58779_Figure_7_figure_supplement_1.pdf
- elife_poa_e58779_Figure_7_figure_supplement_2.pdf
- elife_poa_e58779_Transparent_Reporting_File.pdf
- elife_poa_e58779_Figure_5_source_data_1.xlsx
