# Supplementary material for: Kv1.1 channels regulate early postnatal neurogenesis in mouse hippocampus via the TrkB signaling pathway
Source: eLife journal article supplement (doi:10.7554/elife.58779), 2021-05-21
Supplement: supp [file elife-58779-supp-v2.zip › elife_poa_e58779_Figure_5_source_data_1.xlsx]

## Sheet: Training data (WT)
cell-ID	Cm (pF)	Rm (MOhm)	Vm (mV)	cell type	predicted cell type
1166-1	30.72	378.4	-68.1	1	1
1546-1	62.55	33.7	-82.5	1	1
2036-1	28.99	299	-75.3	1	1
2116-1	73.3	7.6	-75	1	1
2380-2	56.68	89.6	-72.4	1	1
2767-2	39.44	30.7	-73.7	1	1
3225-2	30	47.2	-76.2	1	1
3439-1	28.87	31.5	-83.6	1	1
3439-3	29.9	31.5	-83.5	1	1
3439-5	45.9	44.2	-65.9	1	2a
3598-1	52.07	36.8	-80.3	1	1
3657-1	30.3	43.1	-83.1	1	1
3683-3	34.7	54.9	-81.1	1	1
3768-1	25.6	10.7	-80.5	1	1
3888-1	28.2	42.6	-84.6	1	1
3888-2	57.4	46.4	-79.1	1	1
4001-1	25.21	29.8	-82.5	1	1
4008-3	89.2	11.9	-80.1	1	1
4085-2	26.3	31	-81.5	1	1
4085-4	154.5	1.5	-82.2	1	1
4088-1	38.78	8.4	-79.9	1	1
4167-3	33.43	8.4	-84.6	1	1
4253-1	35.46	14.2	-81.6	1	1
4253-1	34.95	14.1	-79.9	1	1
4253-3	11.07	241.6	-66.5	1	2b
4497-3	26.1	32.8	-78.3	1	1
853-4	269.2	2	-72.8	1	1
922-4	897.9	0.71	-74.1	1	1
1203-2	41.6	41.7	-77.4	2a	1
2116-2	35.9	20.2	-80	2a	1
2117-2	15.87	61.5	-71.9	2a	2a
2117-3	22.47	47.3	-82.7	2a	1
2117-4	285	2.1	-75.8	2a	1
2767-4	66.37	2.5	-77.6	2a	2a
2767-6	161	2.4	-70.4	2a	2a
3439-4	8.17	1600	-30.8	2a	2b
3683-1	31.7	57.7	-85.4	2a	1
3684-4	56.2	4	-80.1	2a	1
4085-1	21.12	426	-71.8	2a	1
4494-3	22.88	11.8	-80.4	2a	1
6480-2	33.4	33.7	-79.2	2a	1
853-2	11.26	343.2	-62.7	2a	2b
1203-3	12.1	30.7	-73.3	2b	2a
1765-4	14.85	2000	-64.5	2b	2b
2033-2	12.64	532.3	-53.8	2b	2b
2417-3	11.83	571.6	-64.7	2b	2b
3439-5	18.85	881	-42.5	2b	2a
4167-4	14.4	1600	-48.6	2b	2b
4229-3	9.8	1600	-69.4	2b	2b
4497-2	12.7	1400	-32	2b	2a
6324-3	6.05	1200	-45	2b	2b
922-4	11.72	897.7	-35.8	2b	2b

## Sheet: Training data (Kv1.1 KO)
cell-ID	Cm (pF)	Rm (MOhm)	Vm (mV)	Cell type
1340-2	85.87	5.4	-82.6	1
1340-4	138.8	3.5	-82.6	1
1767-3	52.02	18.4	-80.4	1
2423-3	49.7	336.4	-55.5	1
2766-1	40.34	18.1	-81.4	1
2766-4	42.9	27.2	-76.4	1
2948-4	42.86	24	-78.2	1
3220-2	50.48	16.5	-68.3	1
3604-3	29.3	13	-71.3	1
4234-2	284.83	4.1	-81.3	1
4344-2	39.11	30.8	-77.2	1
4495-1	30.63	101.6	-67.6	1
4495-4	35.1	82.4	-78.9	1
4507-1	30.04	32.5	-87.6	1
1341-1	37.97	17.7	-71.7	2a
1671-2	50.48	75	-75.6	2a
1671-3	40.9	14.5	-79.1	2a
1887-5	13.65	49.2	-76.3	2a
2766-2	9.12	95.4	-80.1	2a
3420-1	44.54	340.9	-61.5	2a
4234-3	26.29	104.4	-73.5	2a
4493-2	30.3	17	-74	2a
5876-3	35.4	12.5	-77.5	2a
5900-1	12.06	898.4	-55.2	2a
6331-2	25.99	501.2	-50.4	2a
6394-2	29.3	28.7	-84.3	2a
851-2	17.29	107.4	-81.39	2a
851-5	142.77	2.8	-85.15	2a
1671-1	12.91	1600	-33.7	2b
1887-4	16.71	4100	-34.5	2b
2423-1	7.21	8200	-26	2b
3967-2	9	2000	-33.27	2b
4354-3	7.12	1600	-31.6	2b
4507-2	11.9	902.7	-61	2b
6121-2	10.55	1600	-30.5	2b
6135-1	12.64	208.8	-56.3	2b
6135-2	17.92	359.6	-44.08	2b

## Sheet: Cell type likelihood
WT							WT
Vm (mV)	Rm (MΩ)	Cm (pF)	Likelihood				Vm (mV)	Rm (MΩ)	Cm (pF)	Likelihood
			Type 1	Type 2a	Type 2b					Type 1	Type 2a	Type 2b
-70.3	191.6	15.5	0.832259	0.167741	4.01872e-07		-85.15	2.8	142.77	0.906655	0.093345	3.71962e-10
-77	188.9	18	0.746832	0.253131	3.6609e-05		-75.5	3.4	159.59	0.909044	0.0909561	2.32265e-09
-76	210	19	0.834188	0.165801	1.13445e-05		-82.6	3.5	138.8	0.899456	0.100544	8.42533e-10
-77	57	20	0.770847	0.229139	1.35351e-05		-81.3	4.1	284.83	0.965969	0.0340312	3.17923e-12
-82	91	21	0.509352	0.490538	0.000109074		-70.2	5.2	91.77	0.789758	0.210241	6.79648e-07
-80	330	21	0.486759	0.513157	8.39131e-05		-82.6	5.4	85.87	0.805136	0.194864	2.81688e-08
-71.8	426	21.12	0.47317	0.526312	0.000518767		-82.4	6.7	33.42	0.470516	0.529448	3.50892e-05
-71.2	85.1	21.73	0.779594	0.220374	3.24063e-05		-80.5	10.3	36.4	0.500137	0.499839	2.34452e-05
-79	43	22	0.57642	0.42262	0.000959537		-76	1	678	0.990427	0.00957305	3.75107e-14
-82.7	47.3	22.47	0.705131	0.29447	0.000399234		-81	3	165	0.920066	0.079934	3.77667e-10
-74.2	418	22.75	0.678374	0.320341	0.0012855		-81	3	180	0.929898	0.0701025	1.86448e-10
-60.6	508.9	22.87	0.589842	0.40977	0.000387943		-78	7	188	0.932608	0.0673923	1.67484e-10
-80.4	11.8	22.88	0.58887	0.410386	0.000743241		-77.5	12.5	35.4	0.477691	0.522249	5.96975e-05
-70.3	460.8	24.49	0.326174	0.661145	0.0126804		-67.7	13	23.7	0.283404	0.698891	0.0177045
-63.3	397.6	24.56	0.598599	0.400431	0.000970395		-71.3	13	29.3	0.377498	0.621106	0.00139607
-81.6	63.2	24.63	0.682674	0.315614	0.00171127		-81.4	14.1	34.95	0.489146	0.510835	1.92087e-05
-64.7	1300	24.99	0.682627	0.315661	0.00171211		-79.1	14.5	40.9	0.543887	0.456101	1.14216e-05
-82.5	29.8	25.21	0.646741	0.351132	0.00212631		-68.3	16.5	50.48	0.585559	0.414391	5.02807e-05
-80.2	86.2	25.38	0.582315	0.413822	0.00386303		-71.3	17	30.26	0.391652	0.607445	0.000903459
-80.5	10.7	25.6	0.675071	0.32058	0.00434852		-82.3	18.1	40.34	0.552605	0.447391	4.19547e-06
-73	196.9	25.74	0.655116	0.339117	0.00576752		-80.4	18.4	52.02	0.644547	0.355451	1.05283e-06
-78.6	64.3	25.75	0.518563	0.469516	0.0119216		-74.9	18.4	33.9	0.451857	0.548012	0.000130678
-78.3	32.8	26.14	0.900729	0.0992703	5.42771e-07		-79.2	21.4	12.25	0.138289	0.818928	0.0427833
-81.5	31	26.3	0.743832	0.256155	1.28977e-05		-78.2	24	42.86	0.562126	0.437866	7.13614e-06
-74.5	196.7	26.7	0.903888	0.0961103	1.45071e-06		-67.6	25.4	46.55	0.552902	0.447016	8.19066e-05
-69	123	27	0.867259	0.13274	6.39391e-07		-76.4	27.2	42.9	0.555992	0.443997	1.09165e-05
-83.5	65.3	27.3	0.785751	0.214236	1.2941e-05		-84.3	28.7	29.3	0.433803	0.56618	1.76361e-05
-82.5	19.6	27.72	0.933909	0.0660896	9.10844e-07		-76	29.6	61.9	0.693866	0.306134	7.0299e-07
-69.6	200.2	27.85	0.880896	0.119097	6.97391e-06		-83.3	30.5	33.6	0.48552	0.514472	8.23341e-06
-84.6	42.6	28.2	0.740676	0.259243	8.10795e-05		-74	30.8	39.11	0.509454	0.490506	4.00029e-05
-83.5	15.9	28.73	0.917924	0.0820635	1.26855e-05		-82.3	31.2	39.1	0.543254	0.456742	3.50728e-06
-83.47	15.9	28.73	0.833791	0.165905	0.000304719		-87.6	32.5	30.04	0.457919	0.542075	5.11784e-06
-83.6	31.5	28.87	0.49728	0.486099	0.0166214		-81.8	35.1	41.95	0.570243	0.429755	2.18877e-06
-75.3	299	28.99	0.821915	0.177546	0.000539326		-74.6	37.3	23.81	0.318992	0.679933	0.00107476
-83	47.2	29.75	0.609315	0.388384	0.00230095		-77.8	37.9	39.27	0.527886	0.472103	1.09238e-05
-76.2	47.2	29.75	0.587335	0.410127	0.00253773		-81.9	43.2	34.93	0.497722	0.502271	7.13816e-06
-83.5	31.5	29.87	0.45501	0.533359	0.0116309		-76.8	44.8	16.41	0.208841	0.784391	0.0067686
-84.8	8.6	29.92	0.656334	0.341405	0.00226119		-76.3	49.2	13.65	0.15972	0.814786	0.0254938
-79	17	30	0.774784	0.222817	0.00239834		-81.3	49.6	23.64	0.342467	0.657401	0.000131636
-68.1	378.4	30.7	0.598479	0.396738	0.00478325		-78.8	65	33.88	0.475098	0.524886	1.6215e-05
-85.4	57.7	31.66	0.682249	0.311682	0.00606898		-76.6	66	31.9	0.441884	0.558069	4.73569e-05
-78	16	32	0.584288	0.408598	0.0071144		-73	71	24.8	0.331329	0.667886	0.000785958
-76	16	33	0.703009	0.293162	0.00382901		-75.6	75	50.48	0.622847	0.377151	1.86498e-06
-78	21	33.19	0.340139	0.646203	0.0136588		-65.1	80.5	20.2	0.231487	0.739615	0.0288978
-79.2	33.7	33.4	0.780181	0.21825	0.00156941		-71.5	82.4	35.1	0.461147	0.538766	8.7591e-05
-79.2	33.7	33.4	0.693346	0.296792	0.00986198		-80.1	95.4	9.12	0.0912881	0.831256	0.0774558
-84.6	8.4	33.43	0.692575	0.297545	0.0098801		-76.9	97.7	30.68	0.429789	0.570168	4.29087e-05
-76.7	220	34.19	0.562732	0.43434	0.00292833		-73	25	42	0.533121	0.466842	3.68922e-05
-81.1	54.9	34.71	0.720958	0.274992	0.0040503		-70	36	21	0.258983	0.730988	0.0100282
-81	14	35	0.445691	0.544964	0.00934486		-65	47	76	0.727946	0.272052	2.58689e-06
-80	16	35	0.738952	0.258569	0.00247919		-78	49	61	0.698306	0.301694	2.97128e-07
-81.6	14.2	35.46	0.68538	0.301695	0.0129257		-68	51	30	0.381751	0.617157	0.00109239
-79.6	20.2	35.9	0.680163	0.311713	0.00812378		-61	72	30	0.355177	0.638456	0.00636736
-71.1	568.2	36.13	0.503794	0.485263	0.0109437		-75	88	32	0.438405	0.561536	5.93033e-05
-83.1	43.1	36.32	0.620628	0.368307	0.0110653		-67.6	101.6	30.63	0.392363	0.607009	0.000627565
-73.2	20.8	36.42	0.813685	0.183011	0.00330393		-73.5	104.4	26.29	0.356885	0.64278	0.000334931
-75.7	264.7	36.61	0.719508	0.274413	0.00607954		-81.39	107.4	17.29	0.241792	0.757552	0.000655896
-77.5	14.9	36.79	0.349202	0.533431	0.117366		-75.7	110.1	23.45	0.323417	0.676197	0.00038596
-78	29	37	0.808599	0.186894	0.00450709		-64.1	111.9	35.27	0.434807	0.564616	0.000577641
-79.9	8.4	38.78	0.741002	0.252264	0.00673348		-62.6	114.9	30.67	0.373593	0.623997	0.00241074
-78	30.7	39.44	0.712331	0.266897	0.0207725		-64	116	12.9	0.0771444	0.516791	0.406064
-75.3	80.4	39.97	0.238985	0.614757	0.146258		-58.6	118.6	36.43	0.425378	0.572465	0.00215629
-81	24	41	0.716787	0.27428	0.00893297		-73.2	118.9	13.96	0.160388	0.812266	0.0273462
-77.4	41.7	41.6	0.70319	0.276509	0.0203016		-68.5	128.6	14.52	0.151628	0.776242	0.0721299
-78.6	28.6	42.68	0.775593	0.210437	0.0139692		-61.4	147.5	39.09	0.467063	0.532454	0.000483599
-84.5	33.6	42.75	0.780808	0.206331	0.0128609		-75.3	157	51.71	0.635028	0.364971	9.66255e-07
-74	85	43	0.634874	0.357407	0.00771859		-66.8	172.3	12.25	0.0955973	0.659234	0.245168
-76.7	14.1	43.36	0.623235	0.351137	0.025628		-64.5	175.9	52.67	0.601093	0.398889	1.84019e-05
-66.2	327.5	43.41	0.865805	0.129533	0.00466229		-71.9	188.4	35.01	0.466721	0.533237	4.24854e-05
-74.4	88.1	44.01	0.888171	0.109906	0.00192329		-55.5	197.6	10.1	0.0028734	0.0325405	0.964586
-80.2	16.5	44.39	0.71701	0.269637	0.0133538		-55.5	197.6	10.1	0.0028734	0.0325405	0.964586
-77.8	26	44.4	0.71701	0.269637	0.0133538		-60.3	199	25.8	0.302685	0.686718	0.0105972
-79.7	15.3	45.18	0.876788	0.119608	0.00360354		-73.9	200.8	13.19	0.152201	0.82538	0.0224192
-81	28.5	46.53	0.838353	0.157671	0.00397539		-78.1	208.6	30.97	0.442904	0.55708	1.59211e-05
-72.8	32.2	47.7	0.862876	0.134528	0.00259619		-56.3	208.8	12.64	0.0205563	0.159171	0.820273
-82.3	22	48	0.751243	0.239205	0.00955278		-71.2	213.3	21.94	0.287906	0.710715	0.0013784
-83.8	35.6	48.39	0.8177	0.166266	0.0160335		-60.4	217.6	11.02	0.0222254	0.201072	0.776702
-80.2	8.1	48.62	0.838391	0.152453	0.00915603		-64.2	220.8	11.55	0.06106	0.480696	0.458244
-82.5	13.8	49.24	0.479065	0.506989	0.013946		-50.7	236.4	29.16	0.297235	0.64348	0.0592847
-83.5	5.2	49.6	0.47002	0.515888	0.0140921		-75.8	246.1	30.28	0.425619	0.574349	3.2338e-05
-81.1	7.9	51.59	0.902746	0.0948148	0.00243931		-65.1	274.4	26.35	0.331519	0.666677	0.00180443
-81.1	7.9	51.6	0.852991	0.143266	0.0037421		-62	306.7	24.54	0.294799	0.698493	0.00670848
-80.3	36.8	52.07	0.807699	0.175811	0.0164898		-78.6	315.9	17.38	0.239775	0.759598	0.00062734
-80.1	4	56.2	0.650519	0.323574	0.0259071		-49.5	336.4	49.7	0.520735	0.477859	0.00140622
-74.5	12.3	56.66	0.736678	0.228212	0.0351097		-61.5	340.9	44.54	0.525841	0.474065	9.46392e-05
-72.4	89.6	56.68	0.815896	0.170534	0.01357		-59.7	340.9	44.5	0.518101	0.481738	0.000161217
-76.6	12.8	57.35	0.87127	0.116078	0.0126521		-44.08	359.6	17.92	0.0155557	0.0821637	0.902281
-79.1	46.4	57.4	0.352137	0.501721	0.146143		-66	110	29	0.365412	0.633193	0.00139399
-75.2	12	57.77	0.763119	0.202251	0.0346296		-43	195	25	0.0803113	0.254615	0.665074
-82.7	45.3	59.85	0.707822	0.254036	0.0381418		-78	201	24	0.343493	0.656401	0.000106861
-77.2	19.6	59.96	0.825352	0.151334	0.0233137		-76	228	10	0.101011	0.828749	0.0702398
-71.5	16.3	61.02	0.766379	0.216345	0.0172755		-27	244	12	2.79893e-06	3.79362e-05	0.999959
-80.2	37.7	61.27	0.237657	0.621107	0.141236		-65	256	32	0.404682	0.594834	0.000483561
-79	11	62	0.476944	0.426056	0.0969998		-58.6	409.9	35.97	0.428162	0.57091	0.000927574
-82.5	33.7	62.55	0.767697	0.191082	0.0412207		-55.7	437.3	17.66	0.139381	0.620596	0.240022
-79.6	15.7	64.03	0.777863	0.207154	0.014983		-59.2	443.9	14.81	0.109437	0.612909	0.277654
-79	16	70	0.791426	0.199637	0.00893685		-61.4	470.2	21.05	0.243279	0.73985	0.0168706
-75	7.6	73.25	0.717319	0.281213	0.00146839		-62	474.9	23.83	0.287344	0.706709	0.00594715
-75.9	5.8	74.75	0.432322	0.541688	0.0259894		-48.7	499.5	11.19	0.00180055	0.0188538	0.979346
-80.5	4.6	81.77	0.660926	0.33263	0.00644326		-48.5	499.9	14.57	0.0136037	0.0929317	0.893465
-80.1	11.9	89.2	0.652313	0.340305	0.00738148		-50.4	501.2	25.99	0.256869	0.662042	0.0810897
-73.4	5.5	101.02	0.570071	0.419735	0.0101937		-43.5	503	18.06	0.0177853	0.0928834	0.889331
-81	9	102	0.787161	0.211535	0.00130487		-35.3	569.9	10.88	2.89514e-05	0.000393817	0.999577
-72.5	2.3	136.6	0.519042	0.47063	0.0103283		-36.8	571.5	17.41	0.00215148	0.0132675	0.984581
-79	3	143	0.590062	0.398127	0.0118109		-55.6	578.3	13.36	0.045	0.314183	0.640817
-82.2	1.5	154.5	0.766077	0.228141	0.00578237		-66.5	616	13.37	0.136268	0.79396	0.0697724
-77.7	2.8	206.46	0.6938	0.296009	0.010191		-65.3	619.7	26.51	0.339138	0.659979	0.000883338
-81	1	218	0.168949	0.521155	0.309895		-63.4	620.2	33.35	0.419924	0.579784	0.000292007
-83	4	264	0.305098	0.466003	0.228899		-62.3	672.3	10.08	0.0355262	0.350642	0.613832
-79.9	2	269.22	0.625349	0.330679	0.0439711		-50.4	730.6	8.71	0.000516997	0.00784951	0.991633
-77	2	278	0.328172	0.489121	0.182708		-51	731.3	13.73	0.0217874	0.155963	0.82225
-75.8	2.1	285	0.57054	0.357712	0.0717487		-56.6	810.6	7.68	0.0012587	0.0211492	0.977592
-82	2	302	0.760549	0.223368	0.0160822		-55.8	812	22.45	0.243606	0.721356	0.0350386
-84	1	446	0.315818	0.335974	0.348208		-60.7	812	18.54	0.204336	0.763006	0.0326582
-80	2	663	0.758074	0.181472	0.0604536		-55.2	898.4	12.06	0.0279404	0.229568	0.742492
-79	1	739	0.626051	0.205154	0.168794		-69.7	899	15.49	0.186781	0.805074	0.00814472
-76	1	763	0.373443	0.324279	0.302278		-60.5	899.7	12.48	0.0819181	0.583687	0.334395
-74.1	0.7	897.9	0.720535	0.199485	0.0799798		-61	902.7	11.94	0.073317	0.556856	0.369827
-75	35	8	0.671491	0.232377	0.0961323		-48.7	1000	16.44	0.050206	0.276096	0.673698
-78	40	10	0.612233	0.289837	0.0979307		-43.6	1000	19.29	0.0449953	0.207237	0.747767
-76	44	12	0.837193	0.124793	0.0380147		-40.5	1000	13.66	0.00136633	0.011621	0.987013
-73.3	30.7	12.14	0.27455	0.307995	0.417455		-50.9	1000	9.18	0.00116856	0.0160306	0.982801
-77.8	27.5	12.63	0.162278	0.282164	0.555558		-50.8	1000	11.69	0.00777031	0.071993	0.920237
-72	61.5	15.87	0.115055	0.313617	0.571327		-61.7	1000	12.04	0.0839136	0.620043	0.296043
-65	222	18	0.845737	0.117017	0.037246		-54.3	1100	21.6	0.22454	0.720359	0.0551013
-43.3	468.3	18.6	0.227458	0.528097	0.244446		-53.3	1200	28.26	0.319135	0.670052	0.0108133
-80	12	19	0.234846	0.299284	0.46587		-45.4	1200	12.9	0.00415324	0.035638	0.960209
-63.5	83.5	19.45	0.787616	0.137811	0.0745729		-39.2	1200	8.5	2.16791e-05	0.000406418	0.999572
-48	436	21.22	0.719567	0.227225	0.0532081		-61.8	1200	15.47	0.159791	0.779862	0.0603467
-76.9	7.3	22.96	0.659606	0.223116	0.117278		-33.1	1300	7.24	9.869e-07	2.6502e-05	0.999973
-56.5	272.1	23.45	0.432476	0.326977	0.240547		-34.2	1400	10.92	4.28405e-05	0.00057711	0.99938
-52	427	27	0.110255	0.283409	0.606336		-52.3	1400	12.24	0.0203131	0.169003	0.810684
-76.5	12.4	28.8	0.533325	0.384386	0.0822883		-44.4	1400	8.48	0.000113784	0.00195953	0.997927
-70.7	15.5	30.88	0.27539	0.319403	0.405207		-44.4	1400	8.48	0.000113784	0.00195953	0.997927
-71.7	17.7	37.97	0.320513	0.215404	0.464083		-57.9	1400	11.44	0.0445443	0.377592	0.577864
-66.3	44.2	45.87	0.629018	0.204571	0.166411		-33.7	1600	12.91	0.00016199	0.00166916	0.998169
-66	44.2	45.87	0.312254	0.39665	0.291095		-51.8	1600	22.49	0.228306	0.70794	0.0637535
-77.6	2.5	66.37	0.0657586	0.106182	0.82806		-33.2	1600	8.17	3.22759e-06	7.07004e-05	0.999926
-70	2.4	161	0.0492772	0.153342	0.797381		-40.8	1600	17.23	0.0133896	0.0767331	0.909877
-72	104	7	0.0393286	0.0684437	0.892228		-32.4	1600	10.04	1.38559e-05	0.00021974	0.999766
-65	291	7	0.0022722	0.119392	0.878336		-30.5	1600	10.55	1.17828e-05	0.000177797	0.99981
-40	2900	7	0.0278618	0.123427	0.848711		-61.1	2000	14.18	0.137666	0.773672	0.0886619
-34	3000	7	0.102709	0.291174	0.606118		-33.27	2000	9	8.68119e-06	0.000161351	0.99983
-34.2	1000	7.82	0.00311942	0.052481	0.9444		-33.6	2000	9.81	1.94849e-05	0.000312986	0.999668
-62.1	975.3	8.05	0.0420716	0.0674391	0.890489		-47.2	2000	18.62	0.100491	0.454606	0.444902
-67.4	540	8.25	0.496085	0.14516	0.358754		-42.8	2000	12.21	0.00183159	0.0177164	0.980452
-55.9	2500	8.52	0.368196	0.0890956	0.542709		-47.1	2000	16.24	0.0482361	0.273167	0.678597
-60.8	1200	8.85	0.0104785	0.0253345	0.964187		-60.7	2000	15.19	0.154594	0.781701	0.0637048
-45.4	738.9	8.92	0.0312449	0.219949	0.748806		-64.8	2000	13.58	0.143278	0.813318	0.0434046
-45	1800	9	0.0428282	0.144907	0.812265		-25.1	2000	7.76	2.20715e-07	5.97022e-06	0.999994
-25.2	459.6	9.03	0.00132588	0.0525228	0.946151		-47.9	2400	12.2	0.00898843	0.0797439	0.911268
-63.2	903.3	9.17	0.111682	0.0466381	0.84168		-22.6	2700	7.58	1.08256e-07	3.14649e-06	0.999997
-45.4	2400	9.27	0.000683459	0.0392597	0.960057		-55	2700	12.32	0.0529111	0.410199	0.53689
-69.4	1600	9.8	0.0387382	0.13599	0.825272		-46.3	2700	9.69	0.000988608	0.0130697	0.985942
-77	85	10	0.0117373	0.0921191	0.896144		-29.6	2700	13.49	0.000101766	0.00103064	0.998868
-77	174	10	0.186322	0.076407	0.737271		-39.4	2700	10.58	0.000259821	0.00333176	0.996408
-45	1600	10.08	0.308973	0.086466	0.604561		-25.8	3300	8.3	6.9672e-07	1.64952e-05	0.999983
-54.8	883.2	10.4	0.258881	0.110124	0.630996		-34.5	4100	16.71	0.00346992	0.0226507	0.973879
-49.3	643.4	10.65	0.245197	0.113632	0.641171		-38	455	7	1.44964e-06	3.89376e-05	0.99996
-73	134	11	0.0373917	0.108484	0.854124		-56	906	12	0.0324542	0.265286	0.70226
-66.5	241.6	11.07	0.00936041	0.128026	0.862613		-30	913	9	1.77962e-06	3.55597e-05	0.999963
-50.3	1200	11.13	0.00857217	0.0543333	0.937095		-55	1200	12	0.0305061	0.251755	0.717739
-62.6	247.8	11.15	0.00432528	0.0199397	0.975735		-18	1300	13	1.31748e-06	1.74364e-05	0.999981
-35.8	897.7	11.72	0.0186961	0.0354521	0.945852		-55	1400	10	0.00944858	0.104579	0.885972
-64.7	571.6	11.83	0.0059156	0.145285	0.848799		-41	2600	7	1.36401e-05	0.00033446	0.999652
-53.8	532.3	12.64	0.000739384	0.0160676	0.983193
-37.1	2000	12.7	0.204987	0.525139	0.269874
-70.8	571	12.79	0.00117081	0.00897386	0.989855
-40	1900	13	0.0405024	0.370507	0.588991
-45	729.3	13.4	0.00646792	0.0527307	0.940801
-49.2	2000	13.63	0.00162718	0.0251862	0.973187
-66.3	279.6	13.7	0.000360328	0.00665874	0.992981
-48.7	1600	13.79	0.0133735	0.0366884	0.949938
-68	240.9	13.9	0.0130295	0.0239312	0.963039
-48.6	1600	14.4	0.00440721	0.0153514	0.980241
-29.3	2700	14.76	0.000343527	0.0120097	0.987647
-64.5	2000	14.85	0.000222773	0.0422858	0.957492
-68.4	457	16.1	0.00830889	0.0687486	0.922943
-69.6	1400	16.75	0.0134818	0.130462	0.856056
-49.8	533.9	17.19	0.00153851	0.0335128	0.964949
-40.9	1600	17.23	0.00406113	0.0254677	0.970471
-47.1	736.3	17.27	0.000105948	0.0213306	0.978563
-48.6	439.4	17.56	0.000260068	0.00752084	0.992219
-51.4	903	17.8	0.00213457	0.0317502	0.966115
-42	799	18	0.0011656	0.0351755	0.963659
-47.3	806.4	18.1	2.08881e-05	0.00414638	0.995833
-65.8	2000	18.1	0.000412252	0.0108493	0.988738
-64.1	746.8	18.5	0.000104818	0.0065053	0.99339
-61.1	2000	19.2	0.000169683	0.0056355	0.994195
-61.8	2000	19.21	0.00893375	0.00880695	0.982259
-48	1200	21.13	0.000643515	0.00929541	0.990061
