# Supplementary figures and images for: Kv1.1 channels regulate early postnatal neurogenesis in mouse hippocampus via the TrkB signaling pathway
Source: eLife journal article supplement (doi:10.7554/elife.58779), 2021-05-21

Figure 6-Figure Supplement 2

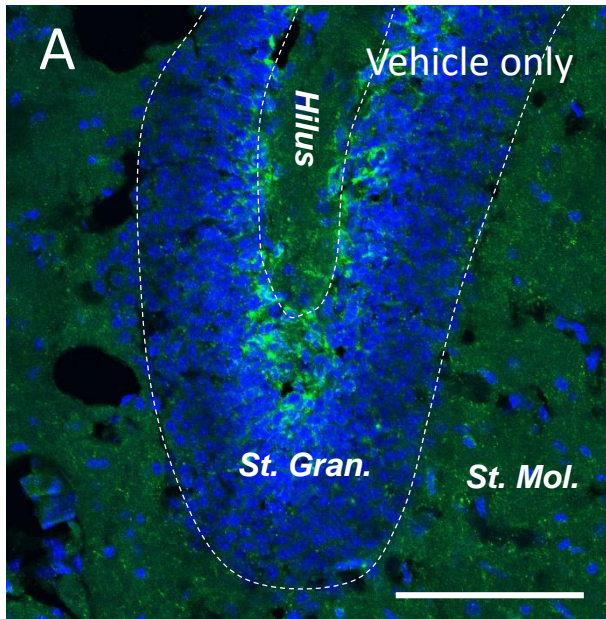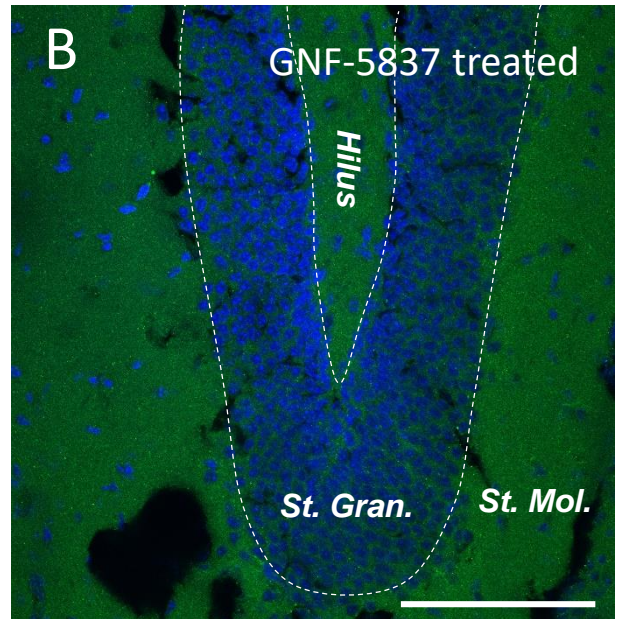

Supplement: supp [file elife-58779-supp-v1.zip]

Figure 6-Figure Supplement 1

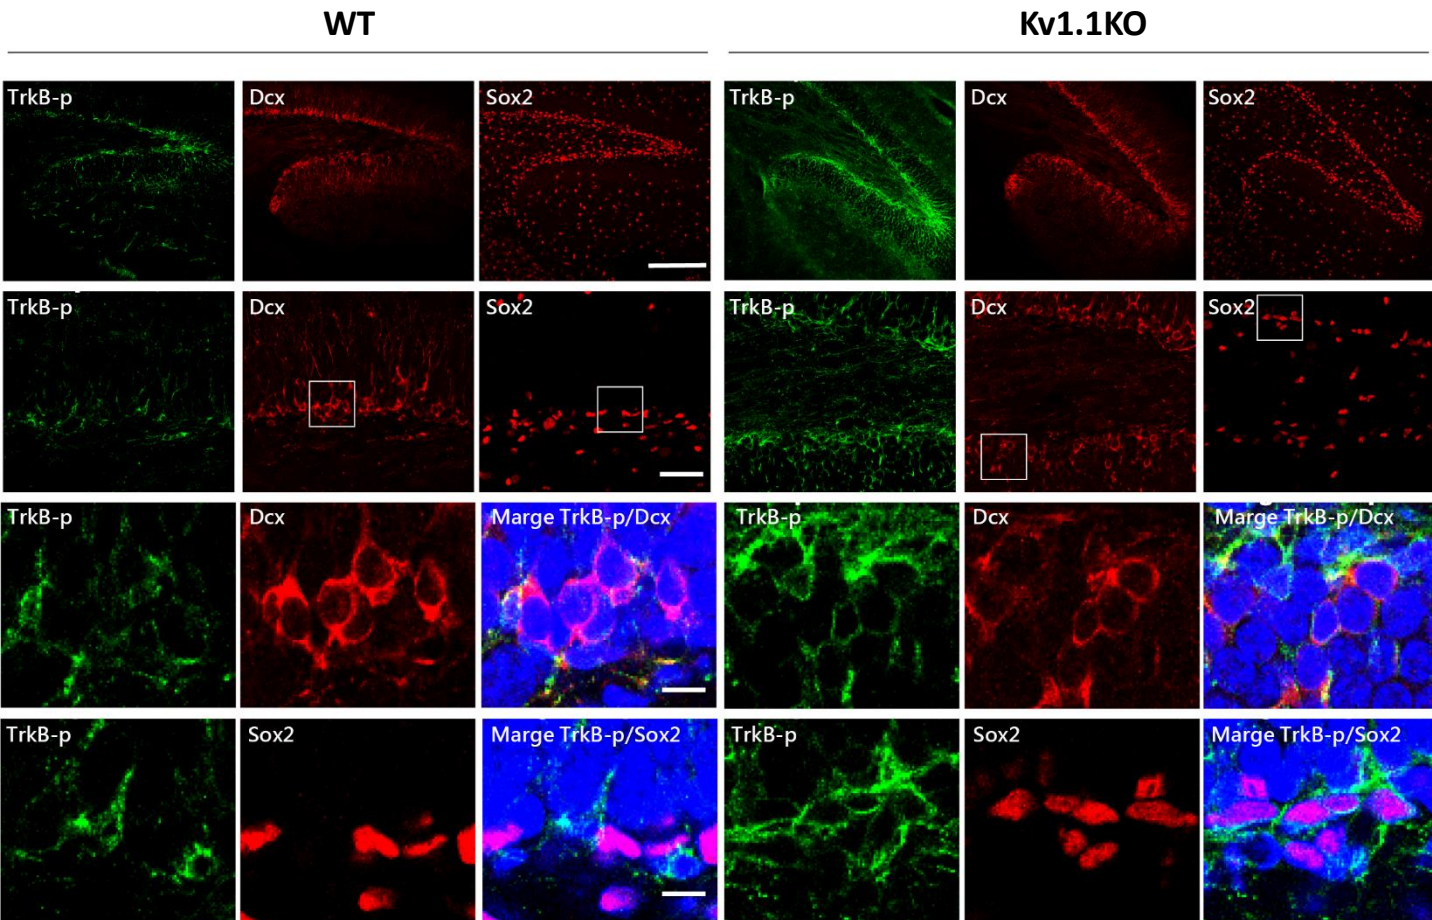

Supplement: supp [file elife-58779-supp-v1.zip]

Figure 1- Figure Supplement 2

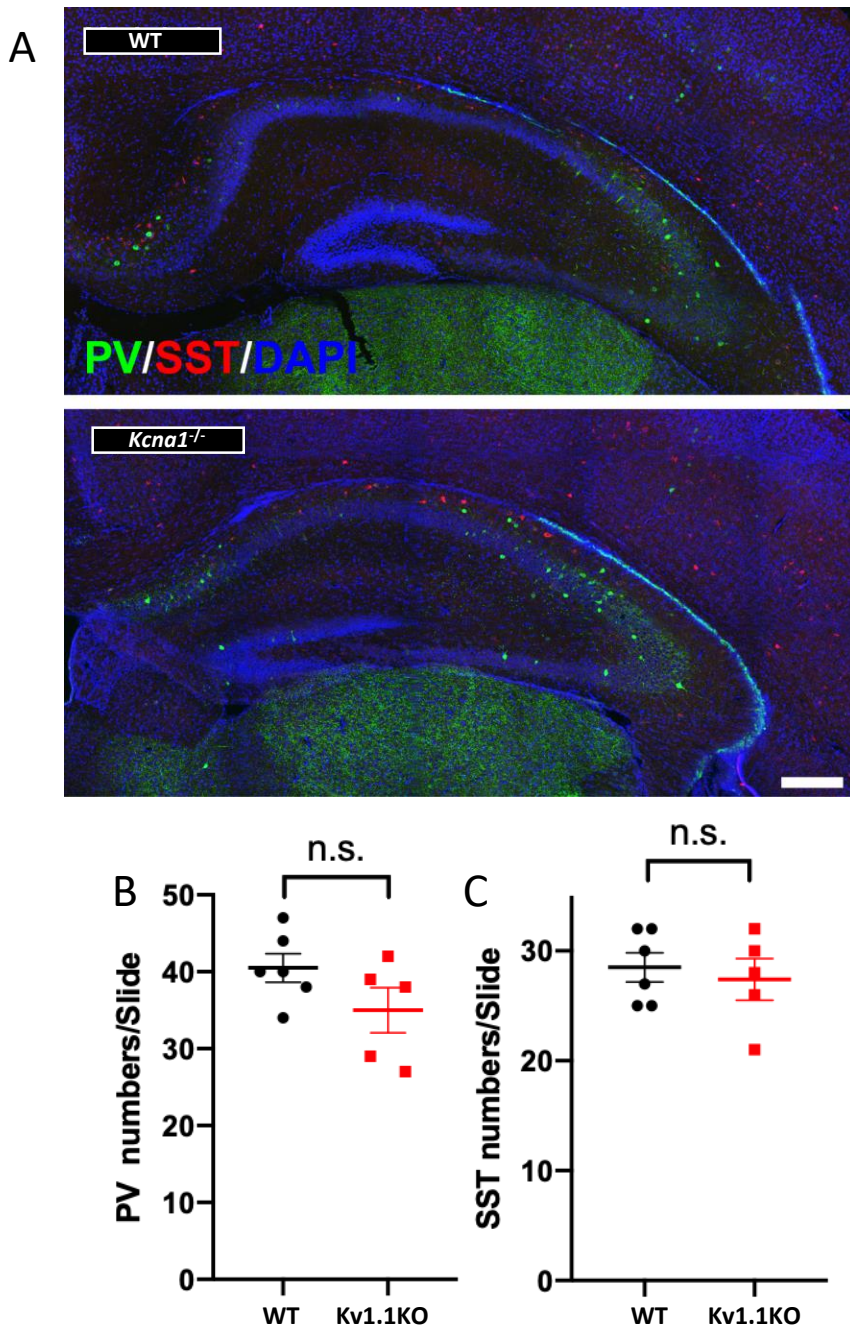

Supplement: supp [file elife-58779-supp-v1.zip]

Figure 1-Figure Supplement 1

A

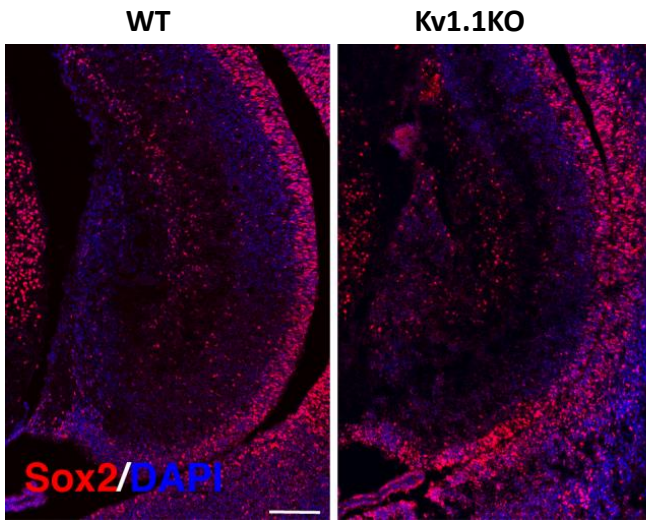

B

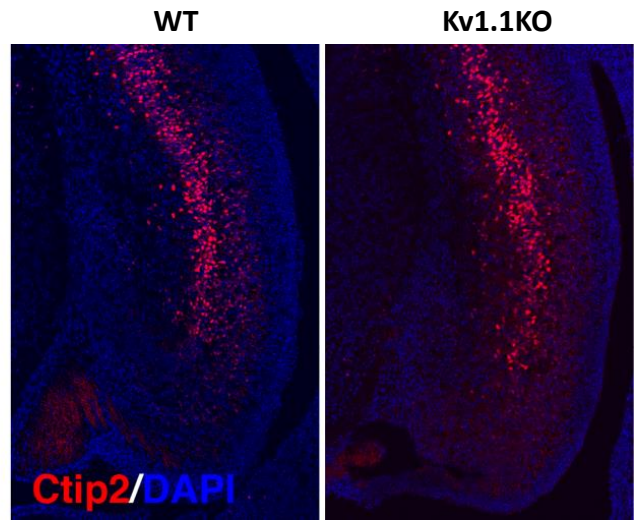

C

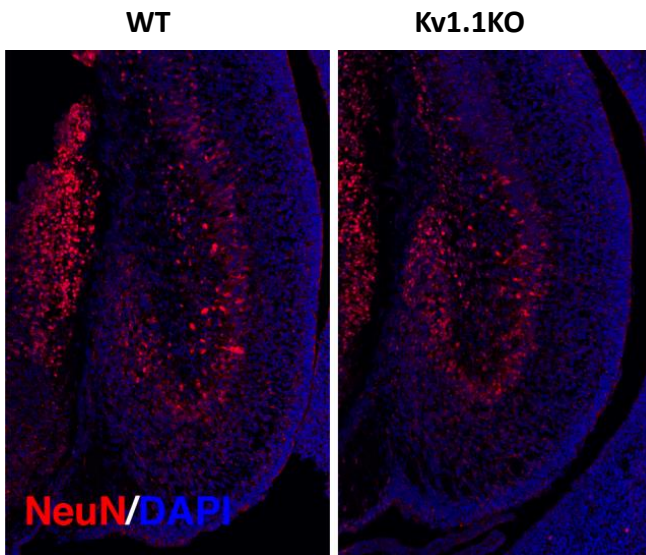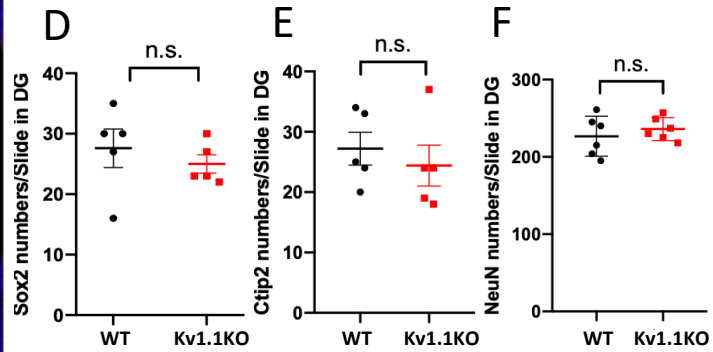

Supplement: supp [file elife-58779-supp-v1.zip]

Figure 7-Figure Supplement 1

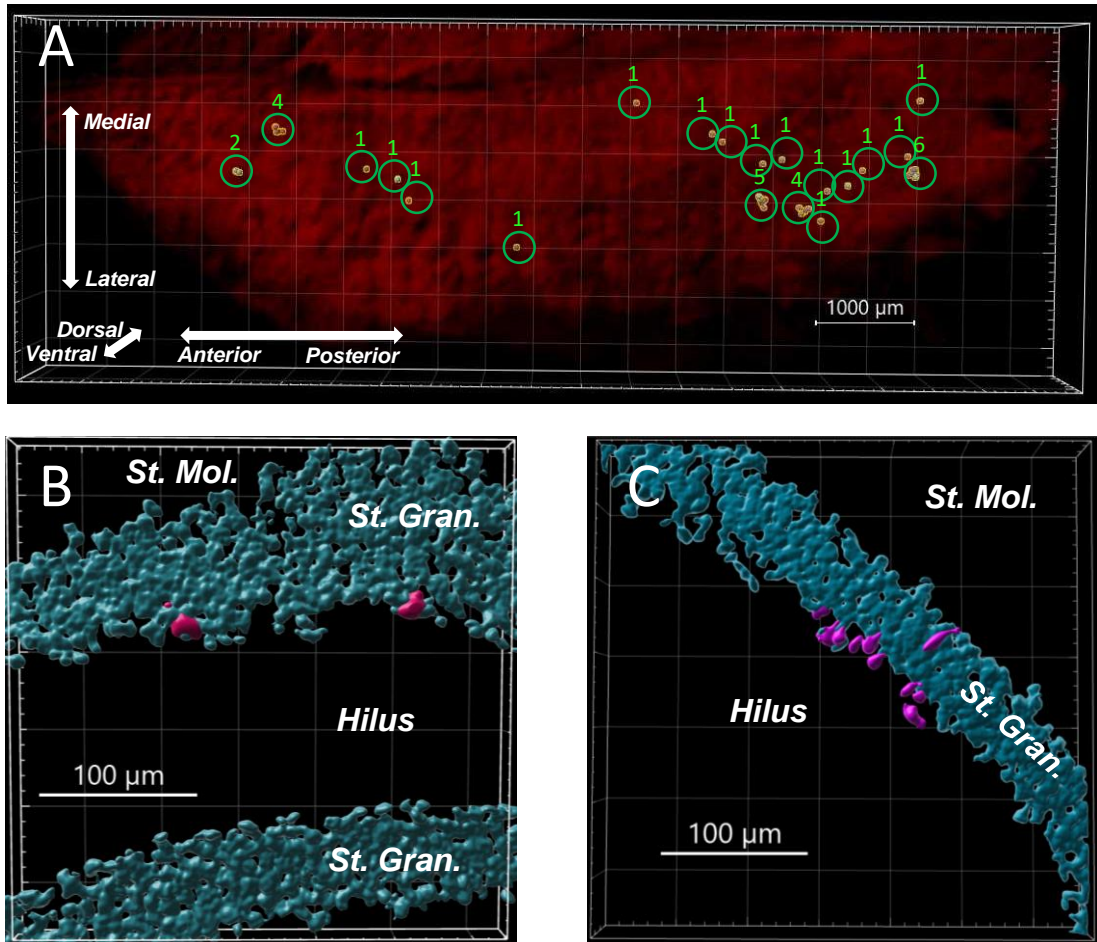

Supplement: supp [file elife-58779-supp-v1.zip]
